# Supplementary material
Source: Research Square preprint supplement (doi:10.21203/rs.3.rs-10192505/v1)
Supplement: Supplementary file 1 [file 6d589b1a87b26e8de327c8d9.docx]

**Table 1.** Patients’ characteristics and preoperative functional and pain scores

|  | Gender | Age | Bone tumor histology | Staging at presentation† | Time from fracture to treatment (weeks) | Cause for treatment delay | Subjective functional level‡ | ECOG performance status scale†† | VAS‡‡ |
| --- | --- | --- | --- | --- | --- | --- | --- | --- | --- |
| Patient 1 | F | 68 | Breast carcinoma metastasis | IV | 12 | Delayed diagnosis | Bedridden | 4 | 10 |
| Patient 2 | F | 73 | Chondrosarcoma | IIB | 32 | Delayed diagnosis | Bedridden | 4 | 9 |
| Patient 3 | M | 56 | Angiosarcoma metastasis | IV | 50 | Inability to provide treatment | Bedridden | 4 | 3 |
| Patient 4 | F | 54 | Lung carcinoma metastasis | IV | 12 | Delayed diagnosis | Bedridden | 3 | 9 |
| Patient 5 | M | 80 | Chondrosarcoma | IIB | 15 | Inability to provide treatment | Bedridden | 4 | 9 |
| Patient 6 | M | 40 | Malignant Giant Cell Tumour | III | 12 | Need for pre-operative medical otimization | Bedridden | 4 | 9 |
| Patient 7 | F | 51 | Breast carcinoma metastasis | IV | 14 | Delayed diagnosis | Wheelchair | 4 | 9 |
| Patient 8 | M | 62 | Lung carcinoma metastasis | IV | 28 | Inability to provide treatment | Wheelchair | 4 | 9 |
| Patient 9 | F | 55 | Breast carcinoma metastasis | IV | 14 | Delayed diagnosis | Bedridden | 4 | 9 |
| Patient 10 | F | 82 | Chondrosarcoma | IIB | 12 | Inability to provide treatment | Bedridden | 4 | 9 |
| Patient 11 | F | 38 | Lung carcinoma metastasis | IV | 12 | Delayed diagnosis | Wheelchair | 4 | 9 |
| Patient 12 | F | 58 | Breast carcinoma metastasis | IV | 14 | Delayed diagnosis | Bedridden | 4 | 10 |

† - Enneking staging system for bone sarcomas; American Joint Committee on Cancer (AJCC) staging system for soft tissue sarcomas; Tumor, nodes, metastasis (TNM) staging system for carcinomas; ‡ - Hospital de Santa Maria subjective classification of functional status; ††ECOG - Eastern Cooperative Oncology Group; ‡‡ - Visual analog scale
