# Supplementary material
Source: Research Square preprint supplement (doi:10.21203/rs.3.rs-10192505/v1)
Supplement: Supplementary file 2 [file 91497cfa6e9a7e6279646946.docx]

**SUPPLEMENTARY INFORMATION**

**Supplementary Table S1.** Hospital de Santa Maria subjective classification of functional status

| *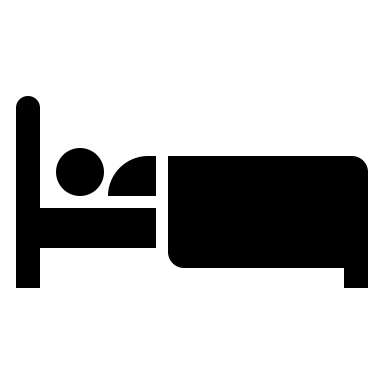* | Bedridden | Patient is confined to bed, but due to pain it is difficult to tolerate sitting |
| --- | --- | --- |
| 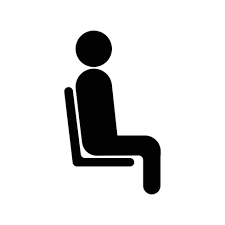 | Able to sit | Patient can sit; however, spends most waking hours in bed |
| 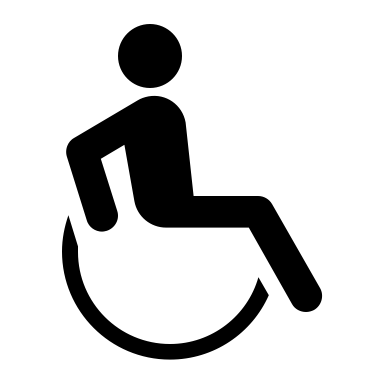 | Using a wheelchair | The patient can sit and spends most waking hours in a wheelchair |
| 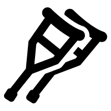 | Walking with crutches | The patient can stand and walk with the aid of crutches for most waking hours |
| 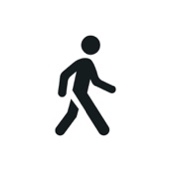 | Walking without aids | The patient can stand and walk without the need of aids |
