# Supplementary material
Source: Research Square preprint supplement (doi:10.21203/rs.3.rs-10192505/v1)
Supplement: Supplementary file 3 [file 9a5a9298037bbbca7c957987.docx]

**Table 2.** Patients’ characteristics and postoperative functional, pain and oncological outcomes

|  | Gender | Age | Bone tumor histology | Tumor volume (cm3) | Surgical margins | Surgical related complications | Subjective functional level‡ | ECOG performance status scale†† | VAS‡‡ | Overall Survival (months) | Patient’s status††† |
| --- | --- | --- | --- | --- | --- | --- | --- | --- | --- | --- | --- |
| Patient 1 | F | 68 | Breast carcinoma metastasis | 1040 | R1 | Post-operative anaemia | Walking with crutches | 2 | 1 | 43 | AWD |
| Patient 2 | F | 73 | Chondrosarcoma | 1097,6 | R0 | Post-operative anaemia; Dislocation; Infection | Walking with crutches | 2 | 3 | 42 | AAWD |
| Patient 3 | M | 56 | Angiosarcoma metastasis | 2392 | R1 | Post-operative anaemia | Wheelchair | 3 | 3 | 26 | DOD |
| Patient 4 | F | 54 | Lung carcinoma metastasis | 634,1 | R1 | Post-operative anaemia | Wheelchair | 2 | 3 | 6 | DOD |
| Patient 5 | M | 80 | Chondrosarcoma | 216 | R1 | Post-operative anaemia | Walking with crutches | 2 | 3 | 34 | AAWD |
| Patient 6 | M | 40 | Malignant Giant Cell Tumour | 94,5 | R2 | Post-operative anaemia | Wheelchair | 3 | 3 | 24 | DOD |
| Patient 7 | F | 51 | Breast carcinoma metastasis | 484 | R1 | Post-operative anaemia | Walking with crutches | 1 | 3 | 30 | AWD |
| Patient 8 | M | 62 | Lung carcinoma metastasis | 1408 | R1 | Post-operative anaemia | Walking with crutches | 2 | 3 | 15 | DOD |
| Patient 9 | F | 55 | Breast carcinoma metastasis | 440 | R0 | Post-operative anaemia | Walking with crutches | 1 | 3 | 37 | AWD |
| Patient 10 | F | 82 | Chondrosarcoma | 454,5 | R0 | Post-operative anaemia | Wheelchair | 2 | 2 | 22 | AAWD |
| Patient 11 | F | 38 | Lung carcinoma metastasis | 346,5 | R1 | Post-operative anaemia | Walking with crutches | 2 | 2 | 6 | DOD |
| Patient 12 | F | 58 | Breast carcinoma metastasis | 134,4 | R1 | Post-operative anaemia | Walking with crutches | 3 | 3 | 20 | DOD |

†† - Hospital de Santa Maria subjective classification of functional status; ‡‡ - Visual analog scale; ††† - AWD – Alive with disease; AAWD – Alive and without disease; DOD – Dead of disease
